# Supplementary material for: FvatfA regulates growth, stress tolerance as well as mycotoxin and pigment productions in Fusarium verticillioides
Source: PubMed Central journal article supplement (PMC7447684; doi:10.1007/s00253-020-10717-6), 2020-07-27
Supplement: 253_2020_10717_MOESM1_ESM.pdf [file 253_2020_10717_MOESM1_ESM.pdf]

# 1 **Applied Microbiology and Biotechnology**

2

## 3 **Supplementary Material**

4

### 5 ***FvatfA* regulates growth, stress tolerance as well as mycotoxin and** 6 **pigment productions in *Fusarium verticillioides***

7

8 Zsuzsa Szabó<sup>1,2</sup>, Klaudia Pákozdi<sup>1,3</sup>, Katalin Murvai<sup>1</sup>, Tünde Pusztahelyi<sup>4</sup>, Ádám  
9 Kecskeméti<sup>5</sup>, Attila Gáspár<sup>5</sup>, Antonio F. Logrieco<sup>6</sup>, Tamás Emri<sup>1</sup>, Attila L. Ádám<sup>7</sup>, Éva  
10 Leiter<sup>1</sup>, László Hornok<sup>8</sup> and István Pócsi<sup>1</sup>

11

#### 12 **Affiliations**

13 <sup>1</sup> Department of Molecular Biotechnology and Microbiology, Institute of Biotechnology,  
14 Faculty of Science and Technology, University of Debrecen, Debrecen, Hungary

15 <sup>2</sup> Doctoral School of Biological Sciences, Faculty of Agricultural and Environmental  
16 Sciences, Szent István University, Gödöllő, Hungary

17 <sup>3</sup> Doctoral School of Nutrition and Food Sciences, Faculty of Medicine, University of  
18 Debrecen, Debrecen, Hungary

19 <sup>4</sup> Central Laboratory of Agricultural and Food Products, Faculty of Agricultural and Food  
20 Sciences and Environmental Management, University of Debrecen, Debrecen, Hungary

21 <sup>5</sup> Department of Inorganic and Analytical Chemistry, Faculty of Science and Technology,  
22 University of Debrecen, Debrecen, Hungary

23 <sup>6</sup> Institute of Sciences of Food Production (ISPA-CNR), Bari, Italy

24 <sup>7</sup> Plant Protection Institute, Centre for Agricultural Research, Budapest, Hungary

25 <sup>8</sup> Faculty of Agricultural and Environmental Sciences, Szent István University, Gödöllő,  
26 Hungary

27

1 **Corresponding author**

2 \*I. Pócsi, e-mail: pocsi.istvan@science.unideb.hu, telephone: +36-52-512900 ext. 62337,

3 ORCID ID: 0000-0003-2692-6453

1 **Supplementary Tables**

2

3 **Supplementary Table S1.** Homologies between FvAtfA orthologous proteins identified in  
 4 various fungal species.

| <b>Species</b>                           | <b>Expect value (blastp to FVEG_02866)</b> | <b>Name</b>                                     | <b>NCBI Accession number</b> |
|------------------------------------------|--------------------------------------------|-------------------------------------------------|------------------------------|
| <i>Fusarium verticillioides</i>          | 0.0                                        | FVEG_02866 hypothetical protein (FvAtfA)        | XP_018746682.1               |
| <i>Fusarium oxysporum f. sp. cubense</i> | 0.0                                        | FoAtf1 (Qi et al. 2013)                         | TVY66251.1                   |
| <i>Fusarium graminearum</i>              | 0.0                                        | FgAtf1 (Nguyen et al. 2013; Jiang et al. 2015)  | XP_011319081.1               |
| <i>Aspergillus nidulans</i>              | 3e-96                                      | AtfA (Hagiwara et al. 2009; Balázs et al. 2010) | ACJ61780.1                   |
| <i>Aspergillus oryzae</i>                | 3e-96                                      | AtfA (Sakamoto et al. 2009)                     | XP_001819834.1               |
| <i>Aspergillus fumigatus</i>             | 2e-102                                     | AtfA (Hagiwara et al. 2014)                     | XP_754486.2                  |
| <i>Schizosaccharomyces pombe</i>         | 1e-33                                      | Atf1 (Takeda et al. 1995)                       | BAA12194.1                   |
| <i>Homo sapiens</i>                      | 4e-21                                      | ATF-2 (Venter et al. 2001)                      | EAX11109.1                   |
| <i>Claviceps purpurea</i>                | 4e-149                                     | CPTF1 (Nathues et al. 2004)                     | CCE33955.1                   |
| <i>Magnaporthe oryzae</i>                | 8e-122                                     | Moatf1 (Guo et al. 2010)                        | XP_003715195.1               |
| <i>Botrytis cinerea</i>                  | 6e-32                                      | BcAtf1 (Temme et al. 2012)                      | CCD34747.1                   |
| <i>Penicillium marneffei</i>             | 6e-87                                      | AtfA (Nimmanee et al. 2014)                     | XP_002143956.1               |
| <i>Neurospora crassa</i>                 | 9e-147                                     | ATF-1 (Colot et al. 2006)                       | XP_011394512.1               |

5

6

1 **Supplementary Table S2.** Oligonucleotides used in this study

| Name                                                                       | Sequence (5'-3')                              | Purpose                                                        |
|----------------------------------------------------------------------------|-----------------------------------------------|----------------------------------------------------------------|
| <b>Primers used to generate the gene deletion and complemented strains</b> |                                               |                                                                |
| <i>FvatfAupfwd</i>                                                         | TTCATTCTGGGTTCTTCTATGGC                       | 5'-flanking region of <i>FvatfA</i>                            |
| <i>FvatfAdownrev</i>                                                       | TCCTCCTTGTCGATGTTCTTTTAG                      | 3'-flanking region of <i>FvatfA</i>                            |
| <i>FvatfAupkinrev</i>                                                      | TCACTGGCCGTCGTTTTACAAAGATCCGCCGGCCTGAACCGCGAA | 5' <i>FvatfA</i> with <i>hph</i> tail                          |
| <i>FvatfAdownkimfwd</i>                                                    | CATGGTCATAGCTGTTTCTGACTTCATTTTCGCGTTTGAGCTGTA | 3' <i>FvatfA</i> with <i>hph</i> tail                          |
| <i>FvatfAnestedfwd</i>                                                     | ACAGTGCCTACAGTGTGAAGCAGG                      | 5' nested of <i>FvatfA</i>                                     |
| <i>FvatfAnestedrev</i>                                                     | GGTTCCATTTGTTGTCGGTGCCTT                      | 3' nested of <i>FvatfA</i>                                     |
| <i>M13F</i>                                                                | TTGTA AACGACGCCAGTGA                          | 5' <i>hph/gen</i> marker gene                                  |
| <i>M13R</i>                                                                | CAGGAAACAGCTATGACCATG                         | 3' <i>hph/gen</i> marker gene                                  |
| <i>FvatfAcompkimfwd</i>                                                    | CATGGTCATAGCTGTTTCTGACAGTGCCTACAGTGTGAAGCAGG  | 5' <i>FvatfA</i> with <i>gen</i> tail                          |
| <i>FvatfAcomprev</i>                                                       | TCTCAATCGCAGCTTGTGTTGCTT                      | 3' <i>FvatfA</i> flanking region outside the terminator region |
| <b>Primers used in copy number determinations</b>                          |                                               |                                                                |
| <i>FVEG2866shortfwd</i>                                                    | CTTGAGGACGGGTTTGACAC                          | forward primer of the <i>FvatfA</i> gene                       |
| <i>FVEG2866shortrev</i>                                                    | CGCTTCGGACTTATTGGTTG                          | reverse primer of the <i>FvatfA</i> gene                       |
| <i>FVEG11192shortfwd</i>                                                   | CAAGCACCACCAGACCTATGT                         | forward primer of the <i>FvmsSOD</i> gene                      |
| <i>FVEG11192shortrev</i>                                                   | CTCCAAGCGTCAATACCG                            | reverse primer of the <i>FvmsSOD</i> gene                      |
| <b>Primers used in qRT-PCR experiments</b>                                 |                                               |                                                                |
| <i>carRAF</i>                                                              | AGCAAACCGACTTTCAC                             | forward primer of the <i>carRA</i> gene                        |
| <i>carRAR</i>                                                              | CCATCCCACAAGACAATG                            | reverse primer of the <i>carRA</i> gene                        |
| <i>carBF</i>                                                               | CTTCTCCTCCCTCGCTTCTTC                         | forward primer of the <i>carB</i> gene                         |
| <i>carBR</i>                                                               | CTCGCCAGACTCAAAATGCTAG                        | reverse primer of the <i>carB</i> gene                         |
| <i>carTF</i>                                                               | ATGAGTGGATTGCTGATGTG                          | forward primer of the <i>carT</i> gene                         |
| <i>carTR</i>                                                               | GGGGTTGAAGAGTTGAAGG                           | reverse primer of the <i>carT</i> gene                         |
| <i>fum1F</i>                                                               | ACAGCCCAAGCAGTAAGC                            | forward primer of the <i>fum1</i> gene                         |
| <i>fum1R</i>                                                               | CACCCGACACACGATATG                            | reverse primer of the <i>fum1</i> gene                         |
| <i>fum8F</i>                                                               | AGCATCCAACAGAAATACGC                          | forward primer of the <i>fum8</i> gene                         |
| <i>fum8R</i>                                                               | GCCTCTCTCATTGAAACGAC                          | reverse primer of the <i>fum8</i> gene                         |
| <i>fum21F</i>                                                              | CCATTACAAGCCATTCCAC                           | forward primer of the <i>fum21</i> gene                        |
| <i>fum21R</i>                                                              | ACAAGCCACGATTTAGACG                           | reverse primer of the <i>fum21</i> gene                        |
| <i>bik1F</i>                                                               | GAGCACACACCAACCATTC                           | forward primer of the <i>bik1</i> gene                         |
| <i>bik1R</i>                                                               | GACTGAGCCGAGATAACAAGC                         | reverse primer of the <i>bik1</i> gene                         |
| <i>tef1F</i>                                                               | GAGCGTGAGCGTGGTATC                            | forward primer of the <i>tef1</i> reference gene               |
| <i>tef1R</i>                                                               | CGAGGGTGTAGGCAAGAAG                           | reverse primer of the <i>tef1</i> reference gene               |
| <i>tub2F</i>                                                               | CGGTCAGTGCGGTAACCAA                           | forward primer of the <i>tub2</i> reference gene               |
| <i>tub2R</i>                                                               | GGCTCGGGGAACATACTTGT                          | reverse primer of the <i>tub2</i> reference gene               |
| <i>cyp2F</i>                                                               | CTACCCCGCCATAACTGCTT                          | forward primer of the <i>cyp2</i> reference gene               |
| <i>cyp2R</i>                                                               | AGAGCACGGAAGTTCTCAGC                          | reverse primer of the <i>cyp2</i> reference gene               |

- 1 **Supplementary Table S3.** Names and functions of *Fusarium verticillioides* genes used in  
 2 qRT-PCR experiments

| <b>Name</b>  | <b>Accession number</b> | <b>Function</b>                                                            | <b>Reference</b> <sup>3</sup> |
|--------------|-------------------------|----------------------------------------------------------------------------|-------------------------------|
| <i>fum1</i>  | FVEG_00316              | polyketide synthase essential for fumonisin production                     | Butchko et al. 2012           |
| <i>fum8</i>  | FVEG_14635              | $\alpha$ -oxoamine synthase                                                | Lazzaro et al. 2012           |
| <i>fum21</i> | FVEG_14633              | transcription factor with Zn(II)2Cys6 DNA-binding domain                   | Butchko et al. 2012           |
| <i>carRA</i> | FVEG_10718              | bifunctional enzyme with phytoene synthase and carotene cyclase activities | Ádám et al. 2011              |
| <i>carB</i>  | FVEG_10717              | carotene desaturase                                                        | Ádám et al. 2011              |
| <i>carT</i>  | FVEG_09251              | carotene-cleaving oxygenase                                                | Ádám et al. 2011              |
| <i>bik1</i>  | FVEG_03379              | polyketide synthase essential for bikaverin production                     | Lazzaro et al. 2012           |
| <i>tef1</i>  | FVEG_02381              | translation elongation factor 1- $\alpha$                                  | Brown et al. 2007             |
| <i>tub2</i>  | FVEG_04081              | $\beta$ -tubulin                                                           | Lazzaro et al. 2012           |
| <i>cyp2</i>  | FVEG_00403              | putative cyclophilin                                                       | Johnson et al. 2018           |

1 **Supplementary Table S4.** Results of the *in silico* promoter analyses for putative ATF/CREB  
 2 transcription factor binding motifs

| Transcription factor | ID       | Species                         |
|----------------------|----------|---------------------------------|
| ATF                  | [T00049] | <i>Saccharomyces cerevisiae</i> |
| ATF                  | [T00051] | <i>Homo sapiens</i>             |
| ATF-1                | [T00968] | <i>Homo sapiens</i>             |
| ATF-2                | [T00167] | <i>Homo sapiens</i>             |
| ATF3                 | [T01313] | <i>Homo sapiens</i>             |
| CREB                 | [T00163] | <i>Homo sapiens</i>             |
| CREB                 | [T00164] | <i>Rattus norvegicus</i>        |
| CREB                 | [T00989] | <i>Mus musculus</i>             |
| CRE-BP2              | [T01017] | <i>Mus musculus</i>             |

3

| Gene        | Transcription factor | ID       | Sequence | Position     | Dissimilarity (%) |
|-------------|----------------------|----------|----------|--------------|-------------------|
| <i>fum1</i> | ATF3                 | [T01313] | TGACTCAA | - 464 - -457 | 7.45              |
|             |                      |          | TGACATCT | -360 - -353  | 7.45              |

4

|             |      |          |           |             |       |
|-------------|------|----------|-----------|-------------|-------|
| <i>fum8</i> | ATF3 | [T01313] | TGACTTGT  | -162 - -155 | 4.93  |
|             |      |          | TGACTACC  | 107-114     | 12.39 |
|             |      |          | TGACATCC  | 125-132     | 8.66  |
|             |      |          | ATCCGTC A | 209-216     | 7.45  |
|             |      |          | CCTAGTCA  | 359-369     | 13.59 |
|             |      |          | TGACTCGA  | 384-391     | 8.66  |
|             |      |          | GAAAGTCA  | 452-459     | 6.14  |
|             |      |          | TTGTGTCA  | 486-493     | 11.18 |

5

|              |      |          |          |           |       |
|--------------|------|----------|----------|-----------|-------|
| <i>fum21</i> | ATF3 | [T01313] | ATTAGTCA | 63-70     | 11.18 |
|              |      |          | TATCGTCA | 205-212   | 8.66  |
|              |      |          | TGACAGAT | 591-598   | 14.91 |
|              |      |          | TGACTACT | 742-749   | 11.18 |
|              |      |          | CCAAGTCA | 780-787   | 6.14  |
|              |      |          | TCCCGTCA | 791-798   | 8.66  |
|              |      |          | CATAGTCA | 807-814   | 13.59 |
|              |      |          | TGACGCCT | 949-956   | 3.73  |
|              |      |          | TGACTGTA | 1064-1071 | 12.39 |

6

7

| Gene         | Transcription factor | ID         | Sequence    | Position  | Dissimilarity (%) |
|--------------|----------------------|------------|-------------|-----------|-------------------|
| <i>carRA</i> | ATF                  | [T00049]   | CGTGACGTCA  | 254-263   | 0.48              |
|              |                      |            | TGACGTCAAC  | 256-265   | 0.24              |
|              | ATF                  | [T00051]   | GTGACGTCA   | 255-263   | 0.31              |
|              |                      |            | TGACGTCAA   | 256-264   | 0.54              |
|              | ATF-2                | [T00167]   | GTGACGTCA   | 255-263   | 0.00              |
|              |                      |            | TGACGTCAA   | 256-264   | 0.05              |
|              | ATF-1                | [T00968]   | CGTGACGTCAA | 254-264   | 4.58              |
|              |                      |            | GTGACGTCAAC | 255-265   | 2.83              |
|              | ATF3                 | [T01313]   | GTATGTCA    | -76 - -83 | 8.66              |
|              |                      |            | ATTTGTCA    | 114-121   | 14.91             |
|              |                      |            | ACGCGTCA    | 121-128   | 4.93              |
|              |                      |            | CAATGTCA    | 160-167   | 9.86              |
|              |                      |            | TGACGTCA    | 256-263   | 0.00              |
|              |                      |            | TGACAGAA    | 285-292   | 14.91             |
|              | CREB                 | [T00163]   | GTGACGTCA   | 255-263   | 0.02              |
|              |                      |            | TGACGTCAA   | 256-264   | 0.02              |
|              | CREB                 | [T00164]   | GTGACGTCA   | 255-263   | 0.00              |
|              |                      |            | TGACGTCAA   | 256-264   | 0.02              |
|              | CRE-BP2              | [T01017]   | GTGACGTCA   | 255-263   | 0.00              |
|              |                      |            | TGACGTCAA   | 256-264   | 0.47              |
|              |                      |            | ATGCCGTCA   | 508-516   | 13.99             |
| TGCCGTAC     |                      |            | 509-517     | 13.52     |                   |
| CREB         | [T00989]             | CGTGACGTCA | 254-263     | 0.00      |                   |
|              |                      | TGACGTCAAC | 256-265     | 0.48      |                   |
|              |                      | TGCCGTACG  | 509-518     | 14.72     |                   |

1

|             |         |          |             |         |       |
|-------------|---------|----------|-------------|---------|-------|
| <i>carB</i> | ATF     | [T00049] | GAAGACGTCA  | 204-213 | 2.28  |
|             | ATF     | [T00051] | AAGACGTCA   | 205-213 | 1.29  |
|             | ATF-1   | [T00968] | GAAGACGTCAT | 204-214 | 3.49  |
|             | ATF-2   | [T00167] | AAGACGTCA   | 205-213 | 1.85  |
|             | ATF3    | [T01313] | ACCCGTCA    | 23-30   | 8.66  |
|             |         |          | GATCGTCA    | 33-40   | 9.86  |
|             |         |          | AGACGTCA    | 206-213 | 0.00  |
|             |         |          | TGACTCTA    | 215-222 | 8.66  |
|             |         |          | TGACTGAG    | 267-274 | 12.39 |
|             | CREB    | [T00989] | GAAGACGTCA  | 204-213 | 6.12  |
|             | CREB    | [T00163] | AAGACGTCA   | 205-213 | 0.86  |
|             | CREB    | [T00164] | AAGACGTCA   | 205-213 | 3.17  |
|             | CRE-BP2 | [T01017] | AAGACGTCA   | 205-213 | 13.99 |
|             |         |          | AGACGTCAT   | 206-214 | 13.99 |

2

| Gene        | Transcription factor | ID       | Sequence  | Position  | Dissimilarity (%) |
|-------------|----------------------|----------|-----------|-----------|-------------------|
| <i>carT</i> | ATF3                 | [T01313] | TTCCGTCA  | -56 - -63 | 7.45              |
|             |                      |          | TCGAGTCA  | 22-29     | 8.66              |
|             |                      |          | ACTCGTCA  | 180-187   | 8.66              |
|             |                      |          | TAGGGTCA  | 212-219   | 12.39             |
|             |                      |          | AAGAGTCA  | 395-402   | 8.66              |
|             |                      |          | AGTCGTCA  | 418-425   | 7.45              |
|             |                      |          | TCTCGTCA  | 482-489   | 8.66              |
|             |                      |          | TGTCGTCA  | 580-587   | 7.45              |
|             |                      |          | TAGCGTCA  | 814-821   | 4.93              |
|             |                      |          | TGACTTTA  | 823-830   | 4.93              |
|             |                      |          | TGACGACA  | 959-966   | 7.45              |
|             | CRE-BP2              | [T01017] | TTGTCGTCA | 579-587   | 13.99             |
|             |                      |          | TGTCGTCA  | 580-588   | 13.99             |
|             |                      |          | ATGACGACA | 958-966   | 13.99             |
| TGACGACAG   |                      |          | 959-967   | 13.99     |                   |

1

|             |      |          |           |             |       |
|-------------|------|----------|-----------|-------------|-------|
| <i>bik1</i> | ATF3 | [T01313] | TGACTCGA  | -67 - -60   | 8.66  |
|             |      |          | TGACCCTG  | 71-78       | 13.59 |
|             |      |          | AAGGGTCA  | 158-165     | 12.39 |
|             | CREB | [T00164] | CAAGGAGAG | -172 - -164 | 10.36 |
|             |      |          | CTGACCCTG | 70-78       | 14.90 |

2

3 \* - Positions are counted starting from the TSS of the DNA sequence of genes selected for  
4 promoter analyses (Supplementary Figure S6).

5



1 **Supplementary Table S5.** Results of One-Way ANOVA analysis.

| Studied property                               |                               | Strains       |                     |                           |                           | One-Way ANOVA   | Tukey post hoc test |          |          | Number of biological replicates with each strain |
|------------------------------------------------|-------------------------------|---------------|---------------------|---------------------------|---------------------------|-----------------|---------------------|----------|----------|--------------------------------------------------|
|                                                |                               | FGSC 7600 (A) | $\Delta FvatfA$ (B) | <i>FvatfA</i> 'C (H7) (C) | <i>FvatfA</i> 'C (H9) (D) | p - value (p <) | adj. p-value        |          |          |                                                  |
|                                                |                               |               |                     |                           |                           |                 | B vs. A             | B vs. C  | B vs. D  |                                                  |
| Vegetative growth (colony diameter. mm)        | Czapek-Dox agar plates        | 79.50±0.60    | 70.13±1.15          | 77.75±1.39                | 77.92±1.51                | 2.20E-16        | 0.00E+00            | 0.00E+00 | 0.00E+00 | 3                                                |
|                                                | Potato Dextrose agar plates   | 81.83±0.39    | 63.71±1.12          | 82.00±0.43                | 82.08±0.29                | 2.20E-16        | 0.00E+00            | 0.00E+00 | 0.00E+00 | 3                                                |
| Invasive growth (colony diameter. mm)          | 72 h tomato                   | 7.92±2.07     | 2.25±0.87           | 6.58±1.38                 | 7.42±1.98                 | 1.19E-10        | 0.00E+00            | 4.00E-07 | 0.00E+00 | 3                                                |
|                                                | 72 h Czapek-Dox agar plate    | 36.67±0.58    | 30.33±1.15          | 37.33±0.58                | 38.67±1.53                | 4.42E-05        | 3.32E-04            | 1.63E-04 | 4.57E-05 | 3                                                |
|                                                | 96 h tomato                   | 12.75±4.16    | 3.08±0.79           | 10.33±3.73                | 11.50±3.80                | 3.42E-08        | 1.00E-07            | 2.68E-05 | 1.60E-06 | 3                                                |
|                                                | 96 h Czapek-Dox agar plate    | 53.33±1.53    | 43.67±0.58          | 52.00±2.65                | 51.67±0.58                | 2.68E-04        | 3.22E-04            | 8.94E-04 | 1.17E-03 | 3                                                |
| Spore production ( $\times 10^7/\text{cm}^2$ ) |                               | 6.21±0.29     | 3.98±0.36           | 5.97±0.14                 | 6.24±0.41                 | 5.85E-05        | 1.18E-04            | 2.65E-04 | 1.08E-04 | 3                                                |
| Spore size ( $\mu\text{m}$ )                   | Arc lenght                    | 10.43±0.23    | 8.07±0.13           | 8.95±0.41                 | 9.02±0.90                 | 3.25E-03        | 2.07E-03            | 2.22E-01 | 1.78E-01 | 3                                                |
|                                                | Spore diameter                | 4.85±0.66     | 4.94±0.18           | 3.93±0.51                 | 4.19±0.51                 | 9.64E-02        | 9.96E-01            | 1.36E-01 | 3.16E-01 | 3                                                |
| Spore viability (number of colonies)           | 25 °C                         | 86.67±10.67   | 81.67±7.42          | 71.78±11.72               | 87.44±11.63               | 1.25E-02        | 7.45E-01            | 2.10E-01 | 6.52E-01 | 3                                                |
|                                                | 42 °C                         | 74.67±11.62   | 71.44±11.96         | 68.33±7.38                | 71.33±8.36                | 6.16E-01        | 9.02E-01            | 9.11E-01 | 1.00E+00 | 3                                                |
|                                                | 45 °C                         | 46.67±6.63    | 39.89±5.75          | 45.56±7.38                | 49.33±5.00                | 2.30E-02        | 1.20E-01            | 2.40E-01 | 1.55E-02 | 3                                                |
|                                                | 4 °C                          | 25.00±8.83    | 24.11±6.60          | 32.00±4.61                | 30.11±6.11                | 4.70E-02        | 9.92E-01            | 8.02E-02 | 2.50E-01 | 3                                                |
| Abiotic stress tolerance (relative growth)     | H <sub>2</sub> O <sub>2</sub> | 74.59±1.23    | 40.04±0.94          | 68.23±5.96                | 66.87±7.34                | 9.84E-05        | 9.88E-05            | 4.21E-04 | 5.93E-04 | 3                                                |
|                                                | tBOOH                         | 54.58±0.69    | 47.83±1.75          | 50.55±2.83                | 50.67±2.55                | 2.87E-02        | 1.93E-02            | 4.46E-01 | 4.13E-01 | 3                                                |
|                                                | MSB                           | 6.39±2.70     | 39.76±7.22          | 59.14±4.02                | 58.57±3.45                | 1.80E-03        | 2.87E-03            | 4.22E-03 | 5.07E-03 | 3                                                |
|                                                | CR                            | 52.91±2.90    | 40.22±2.27          | 48.51±3.27                | 49.60±2.57                | 3.02E-03        | 2.31E-03            | 2.69E-02 | 1.40E-02 | 3                                                |
| Fumonisin production ( $\mu\text{g/g DCM}$ )   | FB1                           | 37.27±4.89    | 0.00±0.00           | 37.34±11.17               | 28.44±8.81                | 4.83E-06        | 4.00E-06            | 1.60E-04 | 1.04E-04 | 5                                                |
|                                                | FB2                           | 8.78±1.92     | 0.00±0.00           | 5.62±1.86                 | 6.32±1.01                 | 3.58E-07        | 2.00E-07            | 6.37E-05 | 1.65E-05 | 5                                                |
| Carotenoid production ( $\mu\text{g/g DCM}$ )  |                               | 19.44±2.68    | 0.47±0.03           | 24.46±8.69                | 27.05±4.87                | 9.08E-04        | 8.60E-03            | 2.02E-03 | 1.04E-03 | 3                                                |
| Bikaverin production (mg/g DCM)                | day 5                         | 4.26±1.12     | 41.37±13.32         | 9.57±4.06                 | 9.50±4.24                 | 4.87E-12        | 0.00E+00            | 0.00E+00 | 0.00E+00 | 3                                                |
|                                                | day 7                         | 7.18±5.36     | 52.50±17.45         | 14.31±5.90                | 14.44±7.24                | 2.13E-10        | 0.00E+00            | 0.00E+00 | 0.00E+00 | 3                                                |
|                                                | day 9                         | 9.79±2.56     | 54.50±5.67          | 15.60±7.03                | 11.53±6.09                | 2.20E-16        | 0.00E+00            | 0.00E+00 | 0.00E+00 | 3                                                |

2

3

|                                                   |                     |            |            |            |            |          |          |          |          |   |
|---------------------------------------------------|---------------------|------------|------------|------------|------------|----------|----------|----------|----------|---|
| <b>Gene expression (-<math>\Delta C_T</math>)</b> | <i>fum1</i>         | 8.10±0.88  | 12.10±0.31 | 8.50±0.26  | 8.86±0.05  | 2.93E-05 | 3.81E-05 | 8.31E-05 | 1.76E-04 | 3 |
|                                                   | <i>fum8</i>         | 5.19±0.30  | 8.78±0.16  | 4.08±0.50  | 4.84±0.20  | 4.13E-07 | 3.60E-06 | 4.00E-07 | 1.70E-06 | 3 |
|                                                   | <i>fum21</i>        | 6.25±0.52  | 6.57±0.52  | 4.95±0.54  | 5.54±0.45  | 1.84E-02 | 8.64E-01 | 1.93E-02 | 1.36E-01 | 3 |
|                                                   | <i>bik1</i> (day 3) | 6.93±2.93  | 11.46±0.69 | 7.85±0.48  | 8.15±0.83  | 3.55E-02 | 3.23E-02 | 8.85E-02 | 1.23E-01 | 3 |
|                                                   | <i>bik1</i> (day 5) | 10.65±0.80 | 12.94±2.59 | 8.51±2.28  | 10.00±2.98 | 2.07E-01 | 6.36E-01 | 1.66E-01 | 4.51E-01 | 3 |
|                                                   | <i>carRA</i>        | 7.19±1.22  | 17.12±1.29 | 6.33±0.94  | 5.50±1.73  | 1.54E-05 | 7.46E-05 | 4.06E-05 | 2.32E-05 | 3 |
|                                                   | <i>carB</i>         | 4.68±2.00  | 13.94±0.83 | 4.56±1.08  | 3.22±1.90  | 9.35E-05 | 3.54E-04 | 3.23E-04 | 1.25E-04 | 3 |
|                                                   | <i>carT</i>         | 9.79±0.99  | 10.67±1.54 | 10.40±1.40 | 9.93±1.26  | 8.31E-01 | 8.43E-01 | 9.94E-01 | 8.97E-01 | 3 |

1

2

1 **Supplementary Table S6.** Two-Way ANOVA analysis of abiotic stress tolerance

| Studied property                               |                               | Strains       |            |                     |            |                      |            |                      |            | Two-Way ANOVA    |                     |                                                    |
|------------------------------------------------|-------------------------------|---------------|------------|---------------------|------------|----------------------|------------|----------------------|------------|------------------|---------------------|----------------------------------------------------|
|                                                |                               | FGSC 7600 (A) |            | $\Delta FvatfA$ (B) |            | $FvatfA$ 'C (H7) (C) |            | $FvatfA$ 'C (H9) (D) |            | p-value (strain) | p-value (treatment) | p-value (interaction between strain and treatment) |
|                                                |                               | untreated     | treated    | untreated           | treated    | untreated            | treated    | untreated            | treated    |                  |                     |                                                    |
| Abiotic stress tolerance (colony diameter. mm) | H <sub>2</sub> O <sub>2</sub> | 79.21±0.52    | 59.08±1.01 | 70.04±1.45          | 28.04±1.64 | 78.17±1.94           | 53.29±4.08 | 78.17±1.94           | 52.25±5.52 | 2.20E-16         | 2.20E-16            | 2.20E-16                                           |
|                                                | tBOOH                         | 79.46±1.13    | 43.38±1.09 | 69.75±1.44          | 33.38±1.89 | 78.17±1.94           | 39.54±3.07 | 78.17±1.94           | 39.63±2.70 | 2.00E-16         | 2.00E-16            | 8.87E-02                                           |
|                                                | MSB                           | 78.33±1.50    | 47.29±1.91 | 70.92±1.54          | 28.17±4.82 | 77.46±1.66           | 45.79±2.77 | 77.71±1.55           | 45.50±2.38 | 2.20E-16         | 2.20E-16            | 4.10E-15                                           |
|                                                | CR                            | 79.38±1.00    | 42.00±2.46 | 69.88±1.23          | 28.13±2.07 | 78.17±1.94           | 37.88±1.69 | 78.17±1.94           | 38.79±2.77 | 2.20E-16         | 2.20E-16            | 1.20E-03                                           |

| Studied property                               |                               | Tukey post hoc test (adj. p-value) |                     |                     |                   |                   |                   |
|------------------------------------------------|-------------------------------|------------------------------------|---------------------|---------------------|-------------------|-------------------|-------------------|
|                                                |                               | B vs. A (untreated)                | B vs. C (untreated) | B vs. D (untreated) | B vs. A (treated) | B vs. C (treated) | B vs. D (treated) |
| Abiotic stress tolerance (colony diameter. mm) | H <sub>2</sub> O <sub>2</sub> | 2.00E-07                           | 5.30E-06            | 5.30E-06            | 0.00E+00          | 0.00E+00          | 0.00E+00          |
|                                                | tBOOH                         | 0.00E+00                           | 0.00E+00            | 0.00E+00            | 0.00E+00          | 0.00E+00          | 0.00E+00          |
|                                                | MSB                           | 0.00E+00                           | 0.00E+00            | 0.00E+00            | 0.00E+00          | 0.00E+00          | 0.00E+00          |
|                                                | CR                            | 0.00E+00                           | 0.00E+00            | 0.00E+00            | 0.00E+00          | 0.00E+00          | 0.00E+00          |

2

3

- 1 **Supplementary Table S7.** Distribution of fumonisins FB1 and FB2 between culture supernatants  
 2 and mycelia in *Fusarium verticillioides* static liquid cultures

| Strains               | FB1                                       |                                        | FB2                                       |                                         |
|-----------------------|-------------------------------------------|----------------------------------------|-------------------------------------------|-----------------------------------------|
|                       | In supernatant<br>( $\mu\text{g/g DCM}$ ) | In mycelium<br>( $\mu\text{g/g DCM}$ ) | In supernatant<br>( $\mu\text{g/g DCM}$ ) | In mycelium<br>( $\mu\text{g/g DCM}$ )  |
| FGSC 7600             | 31.02 $\pm$ 4.71<br>(80.44 $\pm$ 2.44%)   | 7.68 $\pm$ 2.36<br>(19.56 $\pm$ 2.44%) | 5.26 $\pm$ 0.95<br>(83.78 $\pm$ 2.04%)    | 1.03 $\pm$ 0.31<br>(16.22 $\pm$ 2.04%)  |
| $\Delta FvatfA$       | 0.00 $\pm$ 0.00<br>(0.00 $\pm$ 0.00%)     | 0.00 $\pm$ 0.00<br>(0.00 $\pm$ 0.00%)  | 0.00 $\pm$ 0.00<br>(0.00 $\pm$ 0.00%)     | 0.00 $\pm$ 0.00<br>(0.00 $\pm$ 0.00%)   |
| <i>FvatfA</i> 'C (H7) | 26.17 $\pm$ 5.76<br>(83.98 $\pm$ 6.25%)   | 4.85 $\pm$ 1.62<br>(16.02 $\pm$ 6.25%) | 3.63 $\pm$ 1.76<br>(80.06 $\pm$ 10.09%)   | 0.79 $\pm$ 0.20<br>(19.94 $\pm$ 10.09%) |
| <i>FvatfA</i> 'C (H9) | 37.16 $\pm$ 11.75<br>(90.78 $\pm$ 3.62%)  | 3.56 $\pm$ 1.28<br>(9.22 $\pm$ 3.62%)  | 3.94 $\pm$ 0.24<br>(84.54 $\pm$ 3.78%)    | 0.72 $\pm$ 0.18<br>(15.46 $\pm$ 3.78%)  |

10

11

1 **Supplementary Table S8. Results of the PCA analysis****Coordinates of the strains:**

| Strain                | Coordinates |          |          |           |
|-----------------------|-------------|----------|----------|-----------|
|                       | PC1         | PC2      | PC3      | PC4       |
| FGSC 7600             | -2.96274    | -3.23396 | -0.40362 | 3.00E-16  |
| $\Delta FvatfA$       | 7.161313    | -0.30343 | -0.03184 | 1.84E-15  |
| <i>FvatfA</i> 'C (H9) | -2.08427    | 2.352623 | -1.5677  | -1.34E-14 |
| <i>FvatfA</i> 'C (H9) | -2.11431    | 1.184762 | 2.003158 | 1.90E-14  |

**Importance of components:**

|                        | PC1    | PC2    | PC3     | PC4       |
|------------------------|--------|--------|---------|-----------|
| Standard deviation     | 4.7915 | 2.4145 | 1.48708 | 2.335E-15 |
| Proportion of Variance | 0.7406 | 0.1880 | 0.07134 | 0         |
| Cumulative Proportion  | 0.7406 | 0.9287 | 1       | 1         |

2

| Studied property                                  |                               | PC1 <sup>1</sup> | PC2 <sup>1</sup> | PC3      | PC4      |
|---------------------------------------------------|-------------------------------|------------------|------------------|----------|----------|
| Vegetative growth<br>(colony diameter, mm)        | Czapek-Dox agar plates        | -0.20758         | -0.04279         | -0.00465 | 0.434012 |
|                                                   | Potato Dextrose agar plates   | -0.20774         | 0.038742         | 0.013478 | 0.055648 |
| Invasive growth<br>(colony diameter, mm)          | 72 h tomato                   | -0.20622         | -0.04442         | 0.073948 | -0.09748 |
|                                                   | 72 h Czapek-Dox agar plate    | -0.20608         | -0.05582         | 0.055358 | -0.04607 |
|                                                   | 96 h tomato                   | -0.19971         | 0.090416         | 0.128655 | -0.14456 |
|                                                   | 96 h Czapek-Dox agar plate    | -0.20797         | -0.02835         | -0.03227 | 0.328134 |
| Spore size ( $\mu\text{m}$ )                      | Arc lenght                    | -0.16154         | -0.259           | -0.06652 | 0.13909  |
|                                                   | Spore diameter                | 0.116462         | -0.34304         | 0.034062 | 0.222351 |
| Spore viability<br>(number of colonies)           | 25 °C                         | -0.01292         | -0.25843         | 0.523838 | -0.41231 |
|                                                   | 42 °C                         | -0.01587         | -0.39504         | 0.19545  | 0.023971 |
|                                                   | 45 °C                         | -0.18929         | 0.037402         | 0.27661  | 0.223427 |
|                                                   | 4 °C                          | -0.11983         | 0.338667         | -0.0277  | 0.217727 |
| Spore production<br>( $\times 10^7/\text{cm}^2$ ) |                               | -0.20756         | 0.007685         | 0.069213 | -0.03962 |
| Abiotic stress tolerance<br>(relative growth)     | H <sub>2</sub> O <sub>2</sub> | -0.09997         | -0.30782         | -0.31408 | -0.06236 |
|                                                   | tBOOH                         | 0.207575         | -0.04091         | 0.021349 | -0.14876 |
|                                                   | MSB                           | -0.10626         | -0.24973         | -0.413   | -0.31792 |
|                                                   | CR                            | -0.11249         | -0.2497          | -0.39555 | -0.0449  |
| Fumonisin production<br>( $\mu\text{g/g DCM}$ )   | FB1                           | -0.20478         | -0.07977         | -0.0087  | 0.01921  |
|                                                   | FB2                           | -0.19993         | -0.11855         | 0.012671 | -0.04186 |
| Bikaverin production<br>( $\text{mg/g DCM}$ )     | day 5                         | 0.2083           | 0.025066         | 0.00881  | 0.009269 |
|                                                   | day 7                         | 0.208015         | 0.032401         | 0.014124 | 0.090683 |
|                                                   | day 9                         | 0.208101         | 0.005846         | -0.05006 | 0.03274  |
| Carotenoid production<br>( $\mu\text{g/g DCM}$ )  |                               | -0.19628         | 0.126594         | 0.099979 | -0.10448 |
| Gene expression ( $-\Delta C_T$ )                 | <i>fum1</i>                   | -0.20757         | -0.01958         | -0.06238 | 0.021576 |
|                                                   | <i>fum8</i>                   | -0.19977         | 0.112684         | -0.06622 | -0.00509 |
|                                                   | <i>fum21</i>                  | -0.13033         | 0.314506         | -0.12283 | -0.4052  |
|                                                   | <i>bik1</i> (day 3)           | -0.20512         | -0.06493         | -0.06522 | -0.03442 |
|                                                   | <i>bik1</i> (day 5)           | -0.17524         | 0.201537         | -0.16213 | -0.057   |
|                                                   | <i>carRA</i>                  | -0.20433         | 0.073964         | 0.065656 | -0.06968 |
|                                                   | <i>carB</i>                   | -0.2048          | 0.055817         | 0.092464 | -0.06653 |
|                                                   | <i>carT</i>                   | -0.16848         | -0.18475         | 0.259818 | -0.01311 |

3

4 <sup>1</sup> - Properties highlighted with blue, red and green are important component of PC1, PC2 or both,  
5 respectively. The PC1 (*i.e.* the difference between the mutant and the other strains) highly depended  
6 on: growth, invasive growth, stress tolerance, spore morphology, spore production and secondary

1 metabolite production. The PC2 (*i.e.* the difference between the reference and the complemented  
2 strains) highly depended on: spore viability at 4, 25 and 42 °C, spore morphology, stress tolerance  
3 (excluding *t*BOOH and 45 °C heat stress) as well as on the expression of *bik1* (day 5) and *fum21*  
4 genes.

5

6

1 **Supplementary Figures**

2

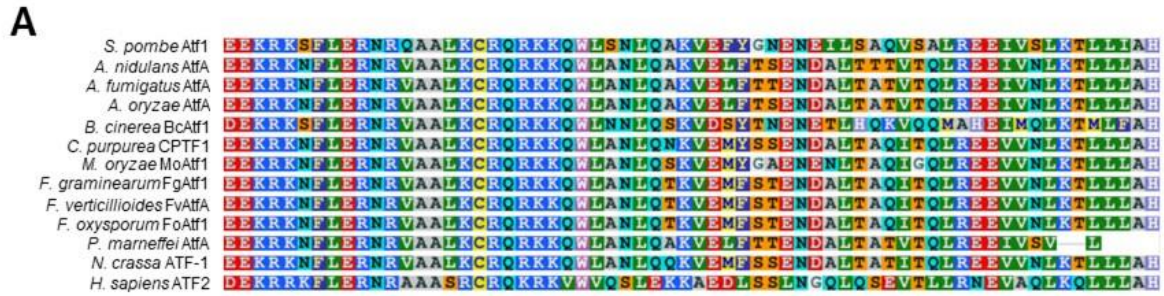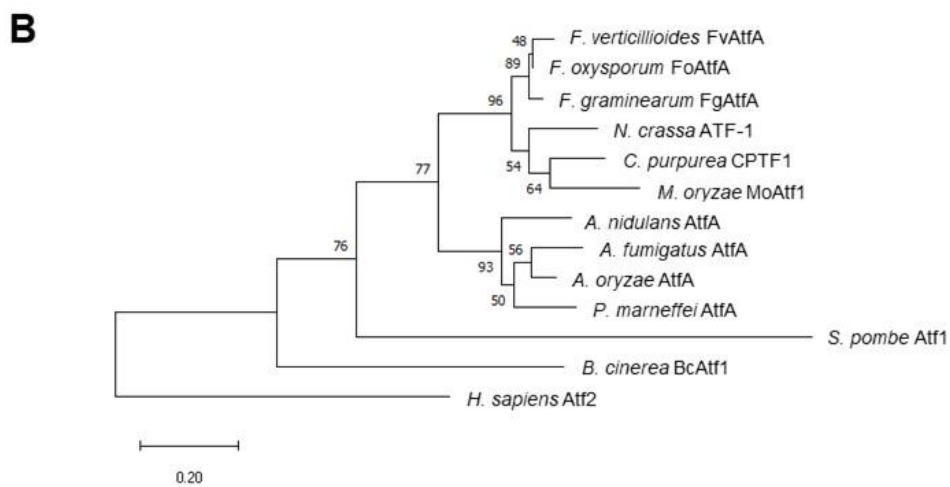

3

4 **Supplementary Figure S1. Multiple sequence alignment and phylogenetic tree**

5 **construction.** In Part A, alignment of bZIP domains of the Atf1/AtfA ortholog transcription  
 6 factors is presented. In Part B, the phylogenetic tree constructed by the Maximum Likelihood  
 7 method and JTT matrix-based model is shown. Homology E expect values in comparison to  
 8 *F. verticillioides* to FVEG\_02866 (putatively encoding FvAtfA; NCBI blastp analysis) are  
 9 summarized in Supplementary Table S1.

10

1

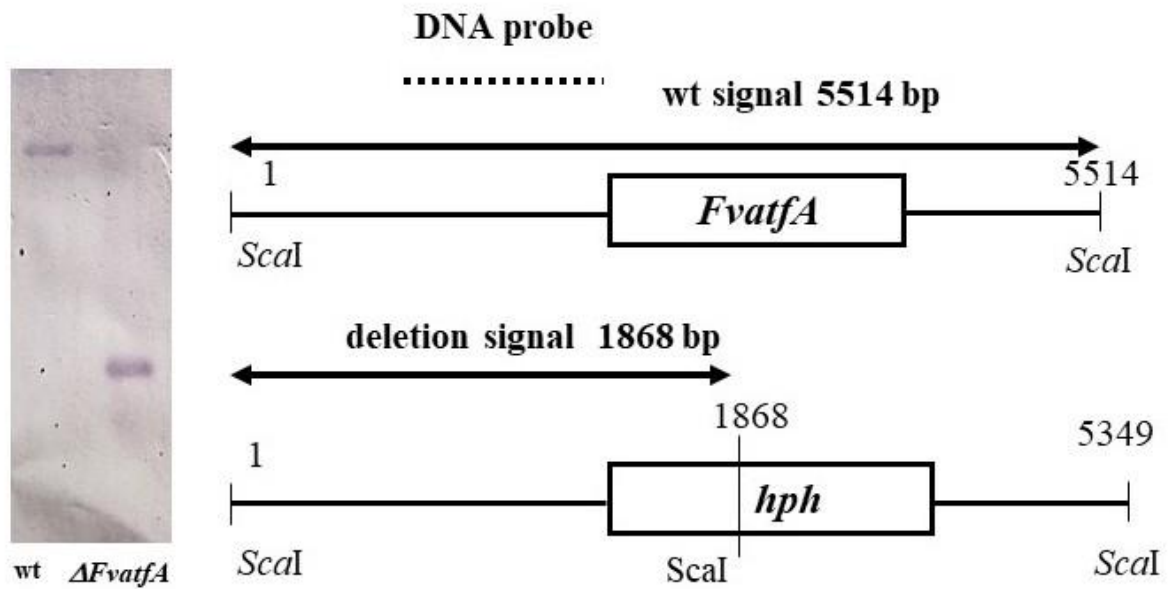

2

3 **Supplementary Figure S2. Confirmation of the *F. verticillioides atfA* gene deletion on**  
 4 **Southern blot.** The *ScaI* restriction sites inside an approximately 5.5 kb long genomic region  
 5 surrounding the *FvatfA* gene are presented in the wild type FGSC 7600 strain and in the  
 6  $\Delta FvatfA$  deletion mutant. The upstream noncoding region of the *FvatfA* gene (indicated by a  
 7 broken line) was amplified by PCR, labelled, and was used as a probe in Southern blotting.  
 8 The probe hybridized to a 5514 bp restriction fragment in the parental FGSC 7600 strain  
 9 while in the  $\Delta FvatfA$  mutant it labelled a 1868 bp fragment (see arrows), as expected.

10



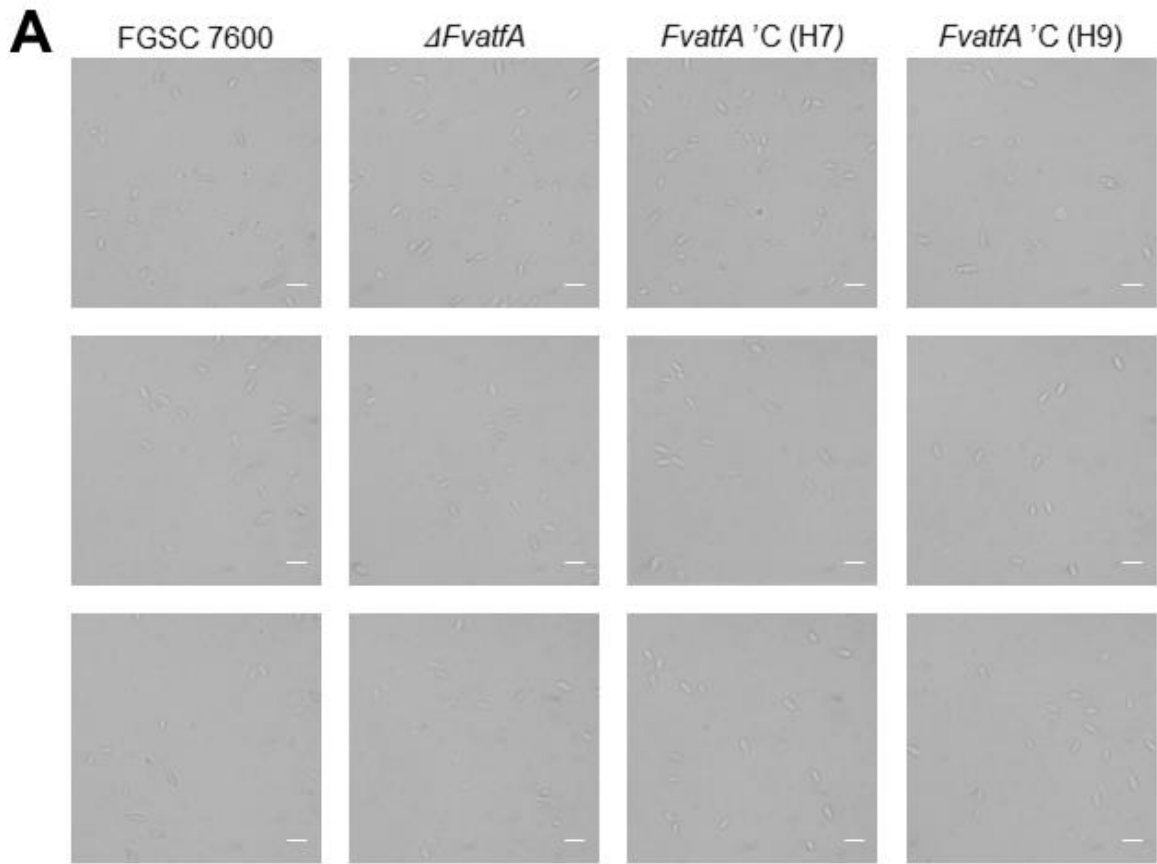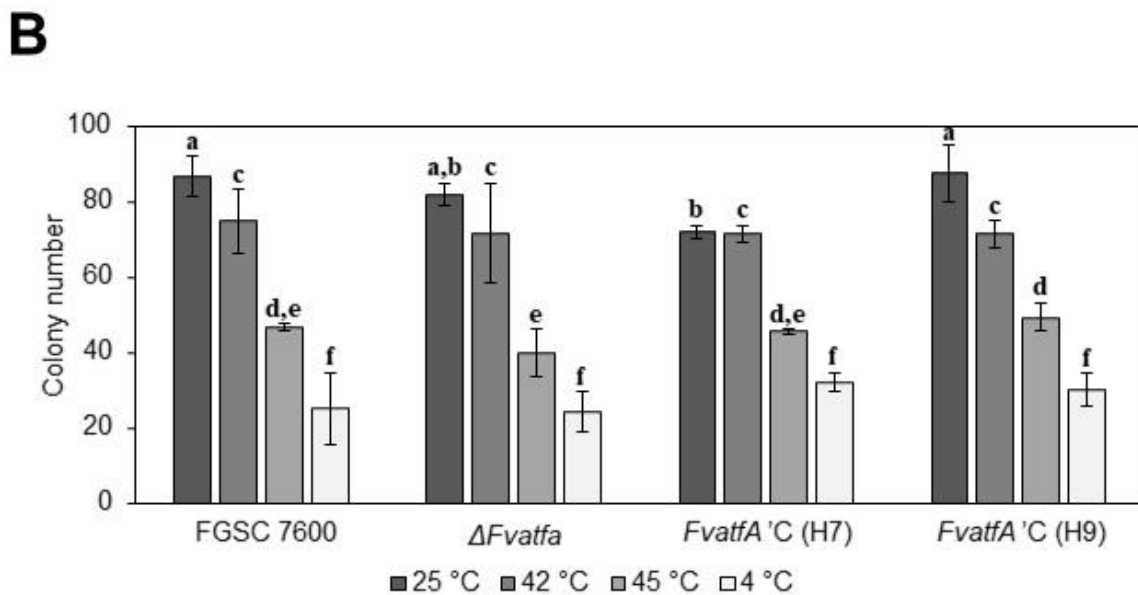

1

2 **Supplementary Figure S3. Variations in the morphology as well as in the heat and cold**  
 3 **tolerances of the conidiospores the *F. verticillioides* FGSC 7600 control, the  $\Delta FvatfA$**   
 4 **mutant and the  $\Delta FvatfA$  'C H7 and H9 complemented strains. In Part A, a typical set of**  
 5 **microscopic photos taken on spore suspensions of the strains are presented. White bars**

1 indicate 10  $\mu\text{m}$ . For statistical evaluation of spore yields and sizes, you can consult Figure 3.  
2 As shown in Part B, no significant differences were found in the heat and cold tolerances of  
3 the conidiospores. In these experiments, freshly grown conidia were kept at 25, 42 or 45 °C  
4 for 60 min or stored at 4 °C for a week. Following that, spore suspensions were spread on  
5 Czapek-Dox Agar medium and the colonies were counted after 2 d incubation at 25 °C.  
6 Different letters indicate significant differences between the tested strains (one-way ANOVA  
7 followed by Tukey post-hoc test; adj.  $p < 0.05$ ). For further details of the ANOVA see also  
8 Supplementary Table S5.

9

10

1

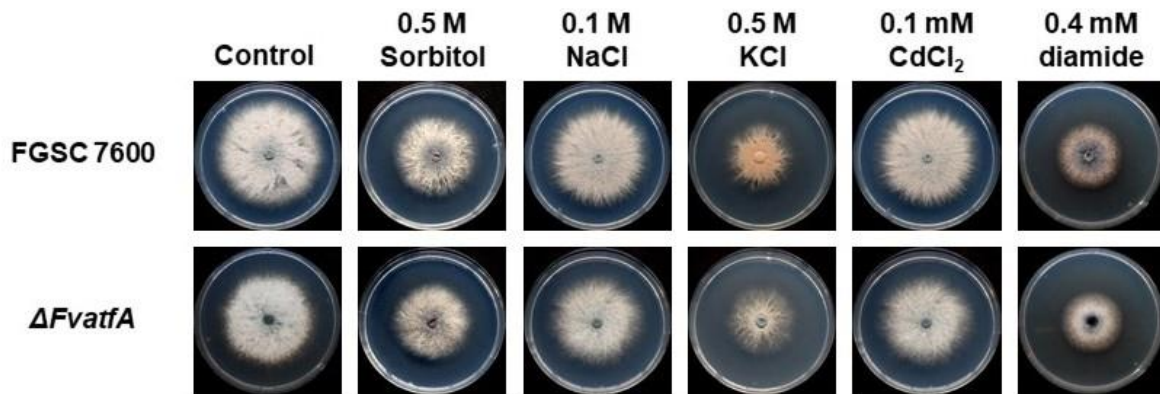

2

3 **Supplementary Figure S4. Testing and comparing the high-osmolarity, heavy metal and**  
4 **diamide tolerances of the *F. verticillioides* control and  $\Delta FvatfA$  gene deletion mutant**  
5 **strains.** A typical set of photos taken on the Czapek-Dox stress agar plates after 6 d  
6 incubations at 25 °C are presented. Please note that all differences observed between the  
7 colony diameters of the tested *F. verticillioides* strains in stress agar cultures could be  
8 attributed to the slow growth phenotype of the  $\Delta FvatfA$  strain (Figure 1).

9

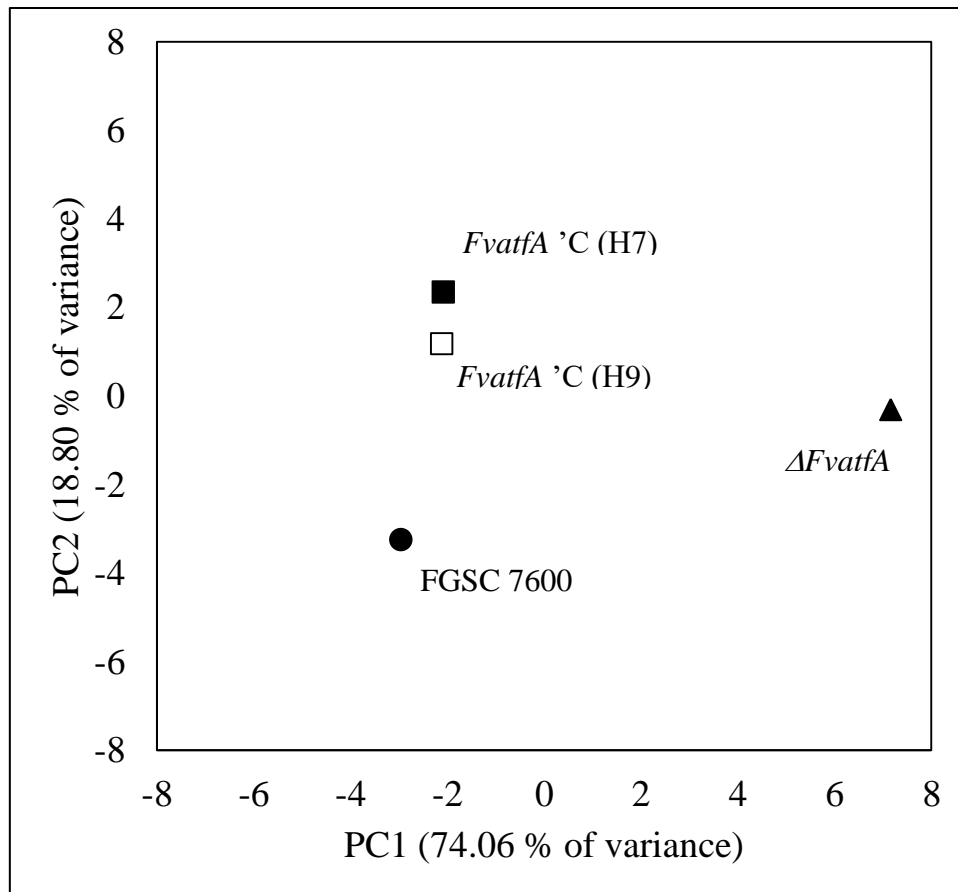

1

2 **Supplementary Figure S5. Principal component analysis of the studied strains.** The  
3 separation of the strains in the score plot of PC1 and PC2 can be interpreted as follow: (i) the  
4 deletion mutant clearly separated from the other three strains, (ii) the wild-type FGSC 7600  
5 separated from the other three strains, (iii) the complemented strains created a group  
6 separating from the wild-type and deletion mutant strains too. PCA was applied on mean  
7 values presented in Supplementary Table S5. For more information of the results of the PCA  
8 analysis see also Supplementary Table S8.

9

1 **FVEG\_00316** *fum1*

2 **C**CACCTCTATGCCAGCCCT**TGACTCAA**TGGCACAGCACGCACACCATCACTAACGGTAAACTCAAAACGACAGC  
3 CGCTTGCATTGAGGCTAAAGCACGGTCCGGCTTATACGAACAGAAGTC**TGACATCT**TTCATGATAAGAAGAA  
4 GAAGAAGAAGCTGTCCGAATGATACAGACCCAAATCAGATATCCGACCCGGCTCCTGGTCCCATTCATTATGA  
5 GCCAATGGGGCAATTGCCCCCTTCCCTACCCGAGTGTTCGGACGTTACTGTCCCTACCCGGGAACTCTAG  
6 CAAACTATTGGGATGTAGGATAATAATAGTAACCTTCTACTGGTTGCCGAATTTCCGGGTCTCTTACTCGTCTT  
7 TGAGGATACTGACAATTGCGCTTCGGAGTATTGCGTGTCTCTCGGATGGGAGACTAAATCGTATACAACAAC  
8 CGGAATTCGATGCTGATTGCAATGATAGAGACGAGACAGA**ATATAACCATGAAATACAGTGTATTGGAG**  
9 **ACTCTGTATTGATCCATCGCAACCTTATTATCGTTTTAAACGCTACTGATATCATCAACGTTTCGACATG**

10 **FVEG\_14635** *fum8*

11 **A**ATTAACAGTTTTAAAACCTTGAAATCAAGATAAAACACTTACCAAGCTAGCACT**TGACTTGT**TGTGTGAAAGTGA  
12 ATTACTCTGTAAACCGAGAAATCCAATATCATGCATTGGCGTTGGCAAAAACAATCCTCTGCTTTTTTGCATGA  
13 ACAATATAACGGAATCTAAATACTCGATGGACCACACGAGTACGTAAAGGTAGCAGCAAATGAAGGC**ATAT**  
14 **AATGAACAAGACGCTCAACTCAATGTATCTCTACTCTCCAAGGAACAGATCTCAAAATGGCTTCTTCTC**  
15 **CTGTGCCAAGCTGGGTGATCGAGGAATGTGACTACTTACCGAATGTGACTCTAGAAAATCTGTG**  
16 **TATGTACAACCTTCAATTATATGCTACAGGTTGAGCTGAGCTACTAGGTAGGTAGCAATGATTTTCTCT**  
17 **CTCACAGAAACAGTGCCCGGAAGCATCTTTTCAAACATCCGACAGATGCCACACGGGGTATCCGAAC**  
18 **TTCCGAATAACCCCACTACAACGTTGGCCTTTTGGATTCTTGGTAGCAGAGTCTACCGATCAGCTACCT**  
19 **TACCTGCTCACTCCATCAGTTTCCAGTCGTTTACTCTCAATGAGGAACAGATACAAAATCATCCCGGGT**  
20 **ACATTTAAAACCTGAGGTTTTCATACAGTCAAGCTCTAACTCTGAACAACCTTCATTTTTTACCCTCTCTCA**  
21 **GCCCTTGCATTGCCATCATGATG**

22 **FVEG\_14633** *fum21*

23 **A**AAAAATATAGAAGAATAATAGATCAAATATGCCTAAAAGAAATGCTCCAGACACGATCCTAGGCCAA**CAT**  
24 **AAAAGCTCATATAACTCCATCCACAAGCTCCTCACCAGTGAACGCTGAATACTGTCCTCTTCACTCAATTG**  
25 **GCTCCAGAAACCACGCCCTTCTTCCAAGTAAAGTGCCATAACCAGTGGATAAGCAAGCAGATGGAAA**  
26 **ATAGGAATAGACCCTATTACCGAGTAAAGCTTATCGGTAGCTGAGTGTGATGCATCTGGTATCTCTCA**  
27 **GTTCAGCCATTATCCATCCAGTACTCCATATCAAACGTTGTTTCTTCCACTTGCTGGGTTGTATCTTGA**  
28 **AGTAACAGCGGGACTAGCCTAGGGGTCGGGCCGTCTGCCGTGATAAGCGCTGTGATGTTACGTTATGTC**  
29 **GACTAAAGTACCGTGCAGGGCATGTTGATGATTGCATGCATTAGTCTACCTAACAGAAACTGCCGTGTT**  
30 **ATCCGAACAAAACATTGAACTTTGCTGTGTCCTTGCCATCATGTTAAATCATAAAGCTGCCTTAATTCT**  
31 **AGGACCTTCGTAGACCTTGTTTTATCTTATTCTACTGTATCATCTGTGATTTATTTTCATCATCAACT**  
32 **TTTCCGATGGCGGGTCCATTGTGTTGTCTCACTCAATCAGATTAGCGCAAATTCGAGACACAAGCCA**  
33 **CGATTTAGACGACGTCGTGGCGGTGTGAGTCGTGTAAGCGTCGTAAAGTCCGGTGTAAAGTTGCTTGGC**  
34 **CTCCTCCACTGCTTTGTACTGTACCTAGCTTATGGTCTTATCACTACTAGGTAATGGCACAAAACCTTG**  
35 **CAATCAATGTCAAGTCTGATCTCCGCTCAGATGGTAATAGTCTCTCAGCCCGAGCTAACCAGAAGAG**  
36 **CAGAAATCGTCGATAGAATGCTTATATAGCAGCTCAAGCTGGAAGCTAACGACGGAGATACAGAGCGT**  
37 **GGACCATCAGGATCGCCGGTGAACATACAAGGGGGAGTTCTCACTCTCCTCAAAACGAGCCCATATGGT**  
38 **GGAATGGCTTGAATGGATCAGCGGAAGAGTCTTCGAGATTTGATGGCTCGGATGCACACAGCCTTTTG**  
39 **ATGAGCCTCAGCAATACCTCACTCTAGGGAGCGATGTGCAACTTACAGGGACATCTGATGAGTCTTTGACCGAC**  
40 **TTCGTTAGCGACCTACCTCTAGGGAGCGATGTGCAACTTACAGGGACATCTGATGAGTCTTTGACCGAC**  
41 **TGGTTGGACCCCAAGCTTGTCAACCAGCAGATACCGCGGCCATTATG**

42 **FVEG\_10718** *carRA*

43 **GTA****GTC**AAAGCATACGATACTCCATGAAGCTATACATACAGGATACACCCATCCACAGCCAGCAGACCACCA  
44 GTAACCTAAC**ATATAGCCAAACCTCATCAGATCGAGATGATCAGGAAGGACGTAGGTCGCATCAATCG**  
45 **CTGGATAACACGGCACGCGATGGGAATATCCATCCATCAAAACCACTAGCACAATTTCTCAGGCTTAT**  
46 **AATCAAGACCCATCTCCATCAGGTAACGGTCAATCTCAAAAAGACCGAGTAACCCGAAAAAAAAGGGTC**  
47 **TCGAGTTAATTGATGACAAGTACACTCGATACCCAAAAGAGTCGAACAAAAAAGTCTGACGTCAAAGGA**  
48 **GTCCCTGAGATGTAACAATCACTCAACGCTCTCCCACTCACACTCAACAATGGTGAGCAGAAGCTA**  
49 **GCGGTGGGGGAGCATTATTGTCACCCAAGAAATAACGGACAGGGGTAAAGGGCTGTGTTAGTATCTGAA**  
50 **AAACAACTGTGGACACAAGCACTCACACTCCGACTTCTTCTCAACAACCTTTTCTCACAATCTT**  
51 **TCACTCTGCTTTTATTTGAAGCCATATCGTCTGCTCTCACTATCTGCTTTTTGTTGTTGTTACGTTAC**  
52 **ACGAAATAAATAAACCTCTGTCAAAATG**

53

1 **FVEG\_10717 *carB***

2 **ATAA**ACCACCAACCAATCATTCAACACGCATCACACCGCCAAGTCC **CTTAAAGACCCTCCAAACCAA** **AC**  
3 **CCGTCA**AT**GATCGTCA**ACGCATCAACGACTTCAATTCTCCTGTAATCTTCAATGAATCACTAAAATCCCT  
4 CAAAAACAAACTGCGCCTCGCTAAGCACAGGGTAATCTGGCCTTTACATGTACGCCAAGTGGTCTCAT  
5 TAGACGAGTGCAGGAAAAAGTGGATCAAAACAAAATG **CAAGACTTATTACTCT**TTGCTTTGGCT  
6 ATCAAAACCGTTGGCTTCGGGTGAGTCGGTTAC **TCACGAA** CATCTTCACTTTTTACAGCAAAA **ATG**

7 **FVEG\_09251 *carT***

8 **AGCTTGATG****TCCGTCAG**ATGTTTTTCATGGAAGCAATTAATGAAACCATGAAAGTAACTATTGTTGCCAAGA **AG**  
9 GATAAAAACCGCCAAGAAAA**TCGAGTCA**GCCATGAAGCAAACATCCAATACCCCGTACCTGAGAGCCAT  
10 CTGACCATTATACATGATTCGCTTGGTTGCTAAGACGAAAGGCTGGTATTTCATAATATCTGCATCGGAGT  
11 AACAGTGATACTATAGAATCTTTTGTTCAGAGAGAATA **CTCGTCA** TGATTATGTTCTCATCACGTTCA  
12 AT**TCGCTCA**ATGTCTTGATTATATCGACCAGGATATGTAATCATCAAGACCAACTTCACTTACCGACATC  
13 GATATCCTCATCGCAATAAACACCACCGCCTGATAGATAGTATGTACCACTTCGGAATCTAATAGCCT  
14 ACTCTAAATCCAGTCAACAAGCAATAAACGCCAGGATCCAGCC **AAAGACTCA**CACACCGGAATCTCG **TC**  
15 **TCGTC**ATCCCCCGCTGCGGTACGCCGCAAATCCACGATGCTCATGCCAACGAAGCACAT **TCGAGTC**  
16 **AGCCACACTCGCTTT**CGCTAACACAGTATCGCAAGTACACGCAAGATGCATCCATCCATCCCTTAAACGC  
17 CAACGTCCAAACTAACCATC **TCTCTCTCA**GCTTTTGATAGGCCCCCCCAAGCGACGAGCGGAACAATAC  
18 CGCACACGCGAAGGCGCACGAAGTATTGAGCCACTAGTGAGTAGGTAGAGTAAATCAAATCGAATCAAC  
19 AACCTCAGCTTTCCGGTGCAGCATGAGTTGTTTTTGTGGTGATTTCTTTTCATGCGGAAGTGTCCGGGGCT  
20 TGGTATTTTCGTTTTATGGTGCAGGATCCGGTTGGTTTACTGATGG **TAGCTCA**T **TCACTTCA**CACAAC  
21 CCATGCGGAATAACAACGAAGCGGGTTTTCGTACTTAATAAGTATGAGATCCATATTTTAAAAATACCCT  
22 ATTATCATGATGCGTTTTGTAAAGAGTTGTGTTTTATTGTTTTAAAGTTGA **TCGAGTCA**GTGAAGCTTT  
23 AAAGTGTTTATCTTCACTTGCAGGTTATCGTGGTCCAAACACTGCATTGCGTTGCAAACGTACACAGA  
24 CATAGACAACAGGGTGCACACTGTGTTGTGATTGTATAGAGCCAATGCTATGTTTCTCACTTGGCACATGAG  
25 CTGAACTTCATTTACGCTTGTGTTTTATAGATATATCTTTAGAGCATGCCTCTTGTCTTGCATCTTTGTTT  
26 CCCAGACCCCAACGATATTGTCGCAAACGAAACGAAAGCAACTTTTTCTCTCTATTATTAGCCAATTT  
27 **TCGCAAATAAACTTTACT** **ATG**

28 **FVEG\_03379 *bik1***

29 **ACTAAAGCCA**ACTGT**CAAGGAGAG**TCTATTCAAGTGCCGAGATTCGAATCACCATCCAGGGACAGAGCCTCAC  
30 GTAGTTGGTATTACACATTAGCGCATCGCGTCCGTGGCTCTTCTCT **TGACTCGA**ATTCGTCTCGGTTACAGGCA  
31 CATACTACGCCACCCTGCCGTTTACGTTCCCTGCAA **ATAAGAATT**CGGACCTCTTCGGAGCTTCATCT  
32 CTGATCTGATCCGTGCGTAACTAGCCGCTATA **TCGAGCTC**GCCCACCCATGCAAGCTTACCG  
33 ACATTTTCGCAAAAGCGCGGAACCAACAGCCATGCCAGCCCTTACGAATTACCAA **AAAGCTCA**CGTATG  
34 TTTGAACCTCTACAGTATAAGCCAGATACATCTTGGCGAGAAAATAGCCAAGACAAACGAATATTGCACC  
35 TTTGTTACAGCTTTCAACAGCGATTCTTTTTGCCATCTTACATTTTCAAG **ATG**

36 **Overlapping genes with the tested gene promoters:**

| Gene         | Chain | Overlapping gene          | Function                         | Chain |
|--------------|-------|---------------------------|----------------------------------|-------|
| <i>carRA</i> | -     | <i>carX</i> (FVEG_10719 ) | carotenoid oxygenase             | +     |
| <i>carB</i>  | -     | <i>carRA</i> (FVEG_10718) | carotene cyclase                 | -     |
| <i>carT</i>  | +     | FVEG_09250                | NA                               | -     |
| <i>fum1</i>  | +     | <i>fum21</i> (FVEG_14633) | Zn(II)2Cys6 transcription factor | +     |
| <i>fum8</i>  | -     | <i>fum3</i> (FVEG_00320)  | dioxygenase                      | -     |
| <i>fum21</i> | +     | <i>zbd1</i> (FVEG_00314)  | zinc binding dehydrogenase       | +     |
| <i>bik1</i>  | -     | <i>bik2</i> (FVEG_03380)  | monoxygenase                     | -     |

37

38 **Supplementary Figure S6.** Putative ATF/CREB transcription factor binding sites on the  
39 promoter regions of the genes involved in secondary metabolite production. Colour code:  
40 **ACGT** – 5' untranslated region between TSS and ATG, **■** – first base of the transcription  
41 start site (TSS), **■** – poly-A tail (PolA), **ATG** – translation start codon, **GTA** – TSS region

1 of the *carX* gene up-stream of *carRA*, [redacted] – binding sites between -150 - +50 bp  
2 with respect to (w.r.t.) TSS, [redacted] – binding sites up-stream of position -150 bp w.r.t.  
3 TSS, [redacted] – binding sites down-stream of position +50 bp w.r.t. TSS.

4

5

## 1 **References**

- 2 **Ádám AL, García-Martínez J, Szűcs EP, Avalos J, Hornok L (2011) The *MAT1-2-1* mating-**  
3 **type gene upregulates photo-inducible carotenoid biosynthesis in *Fusarium***  
4 ***verticillioides*. FEMS Microbiol Lett 318:76-83. doi: 10.1111/j.1574-**  
5 **6968.2011.02241.x.**
- 6 **Balázs A, Pócsi I, Hamari Z, Leiter É, Emri T, Miskei M, Oláh J, Tóth V, Hegedűs N, Prade**  
7 **RA, Molnár M, Pócsi I (2010) AtfA bZIP-type transcription factor regulates oxidative**  
8 **and osmotic stress responses in *Aspergillus nidulans*. Mol Genet Genomics 283:289-**  
9 **303. doi: 10.1007/s00438-010-0513-z.**
- 10 **Brown DW, Butchko RA, Busman M, Proctor RH (2007) The *Fusarium verticillioides* *FUM***  
11 **gene cluster encodes a Zn(II)<sub>2</sub>Cys<sub>6</sub> protein that affects *FUM* gene expression and**  
12 **fumonisin production. Eukaryot Cell 6(7):1210-1218. doi: 10.1128/EC.00400-06**
- 13 **Butchko RA, Brown DW, Busman M, Tudzynski B, Wiemann P (2012) *LaeI* regulates**  
14 **expression of multiple secondary metabolite gene clusters in *Fusarium verticillioides*.**  
15 **Fungal Genet Biol 49(8):602-612. doi: 10.1016/j.fgb.2012.06.003.**
- 16 **Colot HV, Park G, Turner GE, Ringelberg C, Crew CM, Litvinkova L, Weiss RL, Borkovich**  
17 **KA, Dunlap JC (2006) A high-throughput gene knockout procedure for *Neurospora***  
18 **reveals functions for multiple transcription factors. Proc Natl Acad Sci U.S.A.**  
19 **103:10352-10357. doi: 10.1073/pnas.0601456103.**
- 20 **Guo M, Guo W, Chen Y, Dong S, Zhang X, Zhang H, Song W, Wang W, Wang Q, Lv R,**  
21 **Zhang Z, Wang Y, Zheng X (2010) The basic leucine zipper transcription factor Moatf1**  
22 **mediates oxidative stress responses and is necessary for full virulence of the rice blast**  
23 **fungus *Magnaporthe oryzae*. MPMI 23:1053-1068. doi: 10.1094/MPMI-23-8-1053**
- 24 **Hagiwara D, Asano Y, Marui J, Yoshimi A, Mizuno T, Abe K (2009) Transcriptional**  
25 **profiling for *Aspergillus nidulans* HogA MAPK signaling pathway in response to**  
26 **fludioxonil and osmotic stress. Fungal Genet Biol 46(11):868-878. doi:**  
27 **10.1016/j.fgb.2009.07.003**
- 28 **Hagiwara D, Suzuki S, Kamei K, Gono T, Kawamoto S (2014) The role of AtfA and HOG**  
29 **MAPK pathway in stress tolerance in conidia of *Aspergillus fumigatus*. Fungal Genet**  
30 **Biol 73:138-149. doi: 10.1016/j.fgb.2014.10.011**
- 31 **Jiang C, Zhang S, Zhang Q, Tao Y, Wang C, Xu JR (2015) *FgSKN7* and *FgATF1* have**  
32 **overlapping functions in ascosporeogenesis, pathogenesis and stress responses in**



- 1 *Fusarium graminearum*. Environ Microbiol 17:1245-1260. doi: 10.1111/1462-  
2 2920.12561
- 3 Johnson ET, Proctor RH, Dunlap CA, Busman M (2018) Reducing production of fumonisin  
4 mycotoxins in *Fusarium verticillioides* by RNA interference. Mycotoxin Res 34(1):29-  
5 37. doi: 10.1007/s12550-017-0296-8
- 6 Lazzaro I, Busman M, Battilani P, Butchko RAE (2012) *FUM* and *BIK* gene expression  
7 contribute to describe fumonisin and bikaverin synthesis in *Fusarium verticillioides*. Int  
8 J Food Microbiol 160:94-98. doi: 10.1016/j.ijfoodmicro.2012.10.004
- 9 Nathues E, Joshi S, Tenberge KB, Driesch M, Oeser B, Bäumer N, Mihlan M, Tudzynski P  
10 (2004) CPTF1, a CREB-like transcription factor, is involved in the oxidative stress  
11 response in the phytopathogen *Claviceps purpurea* and modulates ROS level in its host  
12 *Secale cereale*. MPMI:383-393. doi: 10.1094/MPMI.2004.17.4.383
- 13 Nguyen TV, Kröger C, Bönninghausen J, Schäfer W, Jörg B (2013) The ATF/CREB  
14 transcription factor Atf1 is essential for full virulence, deoxynivalenol production, and  
15 stress tolerance in the cereal pathogen *Fusarium graminearum*. MPMI 26:1378-1394.  
16 doi: 10.1094/MPMI-04-13-0125-R
- 17 Nimmanee P, Woo PCY, Vanittanakom P, Youngchim S, Vanittanakom N (2014) Functional  
18 analysis of *atfA* gene to stress response in pathogenic thermal dimorphic fungus  
19 *Penicillium marneffei*. PLoS One 9(11): e111200. doi:10.1371/journal.pone.0111200
- 20 Qi X, Guo L, Yang L, Huang J. (2013) Foatf1, a bZIP transcription factor of *Fusarium*  
21 *oxysporum* f. sp. *cubense* is involved in pathogenesis by regulating the oxidative stress  
22 responses of Cavendish banana (*Musa* spp.) Physiol Mol Plant P 84:76-85. doi:  
23 10.1016/j.pmpp.2013.07.007
- 24 Sakamoto K, Iwashita K, Yamada O, Kobayashi K, Mizuno A, Akita O, Mikami S, Shimoi H,  
25 Gomi K (2009) *Aspergillus oryzae atfA* controls conidial germination and stress  
26 tolerance. Fungal Genet Biol 46:887-897. doi: 10.1016/j.fgb.2009.09.004
- 27 Takeda T, Toda T, Kominami K, Kohnosu A, Yanagida M, Jones N (1995)  
28 *Schizosaccharomyces pombe atf1+* encodes a transcription factor required for sexual  
29 development and entry into stationary phase. EMBO J 14(24):6193-6208. doi:  
30 10.1002/j.1460-2075.1995.tb00310.x
- 31 Temme N, Oeser B, Massaroli M, Heller J, Simon A, Collado IG, Viaud M, Tudzynski P  
32 (2012) BcAtf1, a global regulator, controls various differentiation processes and

1       phytotoxin production in *Botrytis cinerea*. Mol Plant Pathol 13:704-718. doi:  
2       10.1111/j.1364-3703.2011.00778.x

3       Venter JC, Adams MD, Myers EW, Li PW, Mural RJ, Sutton GG, Smith HO, Yandell M,  
4       Evans CA, Holt RA, Gocayne JD, Amanatides P, Ballew RM, Huson DH, Wortman JR,  
5       Zhang Q, Kodira CD, Zheng XH, Chen L, Skupski M, Subramanian G, Thomas PD,  
6       Zhang J, Gabor Miklos GL, Nelson C, Broder S, Clark AG, Nadeau J, McKusick VA,  
7       Zinder N, Levine AJ, Roberts RJ, Simon M, Slayman C, Hunkapiller M, Bolanos R,  
8       Delcher A, Dew I, Fasulo D, Flanigan M, Florea L, Halpern A, Hannenhalli S, Kravitz  
9       S, Levy S, Mobarry C, Reinert K, Remington K, Abu-Threideh J, Beasley E, Biddick K,  
10      Bonazzi V, Brandon R, Cargill M, Chandramouliswaran I, Charlab R, Chaturvedi K,  
11      Deng Z, Di Francesco V, Dunn P, Eilbeck K, Evangelista C, Gabrielian AE, Gan W, Ge  
12      W, Gong F, Gu Z, Guan P, Heiman TJ, Higgins ME, Ji RR, Ke Z, Ketchum KA, Lai Z,  
13      Lei Y, Li Z, Li J, Liang Y, Lin X, Lu F, Merkulov GV, Milshina N, Moore HM, Naik  
14      AK, Narayan VA, Neelam B, Nuskern D, Rusch DB, Salzberg S, Shao W, Shue B, Sun  
15      J, Wang Z, Wang A, Wang X, Wang J, Wei M, Wides R, Xiao C, Yan C, Yao A, Ye J,  
16      Zhan M, Zhang W, Zhang H, Zhao Q, Zheng L, Zhong F, Zhong W, Zhu S, Zhao S,  
17      Gilbert D, Baumhueter S, Spier G, Carter C, Cravchik A, Woodage T, Ali F, An H,  
18      Awe A, Baldwin D, Baden H, Barnstead M, Barrow I, Beeson K, Busam D, Carver A,  
19      Center A, Cheng ML, Curry L, Danaher S, Davenport L, Desilets R, Dietz S, Dodson K,  
20      Doup L, Ferriera S, Garg N, Gluecksmann A, Hart B, Haynes J, Haynes C, Heiner C,  
21      Hladun S, Hostin D, Houck J, Howland T, Ibegwam C, Johnson J, Kalush F, Kline L,  
22      Koduru S, Love A, Mann F, May D, McCawley S, McIntosh T, McMullen I, Moy M,  
23      Moy L, Murphy B, Nelson K, Pfannkoch C, Pratts E, Puri V, Qureshi H, Reardon M,  
24      Rodriguez R, Rogers YH, Romblad D, Ruhfel B, Scott R, Sitter C, Smallwood M,  
25      Stewart E, Strong R, Suh E, Thomas R, Tint NN, Tse S, Vech C, Wang G, Wetter J,  
26      Williams S, Williams M, Windsor S, Winn-Deen E, Wolfe K, Zaveri J, Zaveri K, Abril  
27      JF, Guigó R, Campbell MJ, Sjolander KV, Karlak B, Kejariwal A, Mi H, Lazareva B,  
28      Hatton T, Narechania A, Diemer K, Muruganujan A, Guo N, Sato S, Bafna V, Istrail S,  
29      Lippert R, Schwartz R, Walenz B, Yooseph S, Allen D, Basu A, Baxendale J, Blick L,  
30      Caminha M, Carnes-Stine J, Caulk P, Chiang YH, Coyne M, Dahlke C, Mays A,  
31      Dombroski M, Donnelly M, Ely D, Esparham S, Fosler C, Gire H, Glanowski S,  
32      Glasser K, Glodek A, Gorokhov M, Graham K, Gropman B, Harris M, Heil J,  
33      Henderson S, Hoover J, Jennings D, Jordan C, Jordan J, Kasha J, Kagan L, Kraft C,  
34      Levitsky A, Lewis M, Liu X, Lopez J, Ma D, Majoros W, McDaniel J, Murphy S,

1 Newman M, Nguyen T, Nguyen N, Nodell M, Pan S, Peck J, Peterson M, Rowe W,  
2 Sanders R, Scott J, Simpson M, Smith T, Sprague A, Stockwell T, Turner R, Venter E,  
3 Wang M, Wen M, Wu D, Wu M, Xia A, Zandieh A, Zhu X. (2001) The sequence of the  
4 human genome. *Science* 291(5507):1304-1351. doi: 10.1126/science.1058040  
5
